# Supplementary material
Source: PubMed Central journal article supplement (PMC3442860)
Supplement: psb-7-650-s01.pdf [file psb-7-650-s01.pdf]

Supplemental material to:

Christoph Plieth and Sonja Vollbehr. Calcium promotes activity and confers heat stability on plant peroxidases. *Plant Signaling & Behavior* 2012; 7(6);

DOI:10.4161/psb.7.6.20065;

<http://www.landesbioscience.com/journals/psb/article/20065>

## Supplemental data

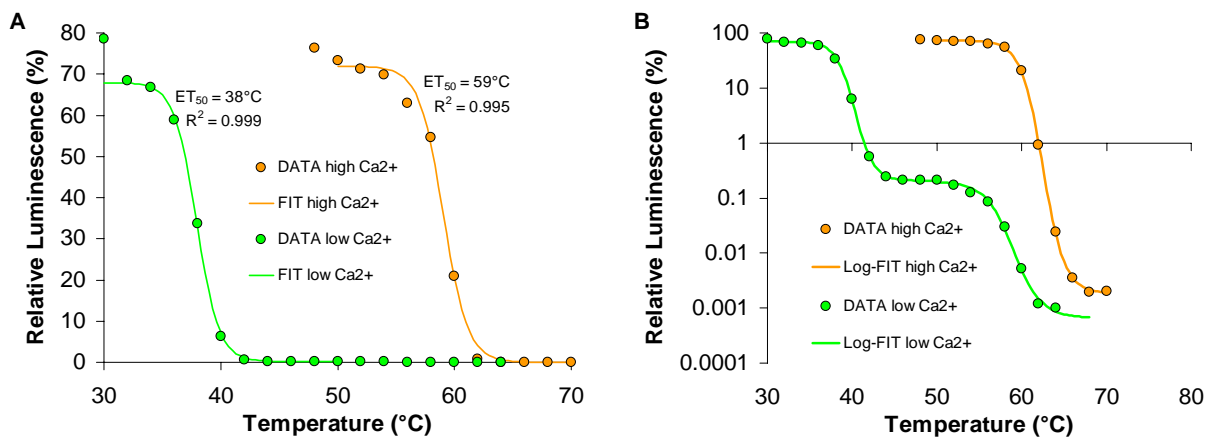Supplemental Figure S1 Heat sensitivity of LUPOs from *Arabidopsis*

**A:** Peroxidases from *Arabidopsis* dissolved either in TriCaT (high [Ca<sup>2+</sup>]) or in TriEDTAT (low [Ca<sup>2+</sup>]) were treated with the temperatures indicated before light yield of the H<sub>2</sub>O<sub>2</sub>-luminol reaction was measured and the ET<sub>50</sub> calculated. **B:** Data from A are plotted on a log scale to show that a residual activity due to residual Ca<sup>2+</sup> remained after heat treatment at low [Ca<sup>2+</sup>] (green curve) which is inactivated at higher temperatures. Data given are means of n = 3. The relative luminescence refers to an untreated sample kept at RT (= 20°C). R<sup>2</sup> are correlation coefficients obtained from curve fitting. Errorbars represent StDv or are below symbol size.

**Supplemental Table S1 The heat stability of peroxidases from different plant species**

The effective temperatures leading to 50% irreversible LUPO inhibition ( $ET_{50}$ ) of different plants species under low and high  $Ca^{2+}$  conditions. 'High [ $Ca^{2+}$ ]' designates buffer conditions with a minimum of 1 mM free  $Ca^{2+}$  during heating. 'Low [ $Ca^{2+}$ ]' designates buffer conditions with free  $Ca^{2+}$  below 0.1  $\mu$ M during heating. The LUPO activity assays were performed for all samples at RT and with high [ $Ca^{2+}$ ]. For *Arabidopsis* HMW designates high-molecular-weight peroxidases and LMW is low-molecular-weight (compare gel filtration **Fig. 7B**). The means are of at least three independent replicates, where standard deviations are given in parentheses. 'n.d.' is 'not determined' These data are depicted in **Fig. 5** ordered by  $ET_{50}$ .

| Popular name                                                                             | Scientific species name     | Race / Variety sub-species | $ET_{50}$ @ low [ $Ca^{2+}$ ] <sub>free</sub> (°C) | $ET_{50}$ @ high [ $Ca^{2+}$ ] <sub>free</sub> (°C)  |
|------------------------------------------------------------------------------------------|-----------------------------|----------------------------|----------------------------------------------------|------------------------------------------------------|
| <u>Dicots</u>                                                                            |                             |                            |                                                    |                                                      |
| Garden cress                                                                             | <i>Lepidium sativum</i>     | "Einfache Grüne"           | 36.3 ( $\pm$ 0.3)                                  | 57.5 ( $\pm$ 0.4)                                    |
| Cotton                                                                                   | <i>Gossypium herbaceum</i>  | Levant cotton              | 39.4                                               | 54.2 ( $\pm$ 4.3)                                    |
| Sunflower                                                                                | <i>Helianthus annuus</i>    |                            | 43.7 ( $\pm$ 4.6)                                  | 47.0 ( $\pm$ 2.1)                                    |
| Thale cress                                                                              | <i>Arabidopsis thaliana</i> | Columbia (Col-0)           | 38.9 ( $\pm$ 0.9)                                  | 58.3 ( $\pm$ 1.0)<br>HMW<br>62.2 ( $\pm$ 0.6)<br>LMW |
| Commercial Horseradish Peroxidase Sigma #P6140 from <i>Armoracia rusticana</i>           |                             |                            | 46.0 ( $\pm$ 0.5)                                  | 68.3 ( $\pm$ 1.8)                                    |
| <u>Monocots</u>                                                                          |                             |                            |                                                    |                                                      |
| Millet                                                                                   | <i>Sorghum bicolor</i>      | Grain sorghum              | 37.9                                               | 46.8                                                 |
| Wheat                                                                                    | <i>Triticum aestivum</i>    |                            | 37.7                                               | 59.9 ( $\pm$ 4.4)                                    |
| Barley                                                                                   | <i>Hordeum vulgare</i>      | "Popp-Gerste"              | 39.8                                               | 53.7                                                 |
| Maize                                                                                    | <i>Zea mays</i>             | "Popcorn"                  | 46.8                                               | 48.6<br>68.9 ( $\pm$ 3.1)                            |
| <u>Cryptogams</u>                                                                        |                             |                            |                                                    |                                                      |
| Stonewort                                                                                | <i>Chara corallina</i>      | <i>australis</i>           | 53.6 ( $\pm$ 4.8)                                  | 51.6 ( $\pm$ 3.2)                                    |
| Toothed wrack                                                                            | <i>Fucus serratus</i>       | Scottish North sea         | 51.2 ( $\pm$ 3.3)                                  | 49.9 ( $\pm$ 2.7)                                    |
| Sea belt                                                                                 | <i>Saccharina latissima</i> | West Baltic                | 56.3 ( $\pm$ 2.6)                                  | 46.0 ( $\pm$ 4.6)                                    |
| Red dulse                                                                                | <i>Palmaria palmata</i>     | Norman-Atlantic            | 50.6 ( $\pm$ 1.9)                                  | 48.2 ( $\pm$ 2.1)                                    |
| Commercial Fungal Lignin Peroxidase Sigma #42603 from <i>Phanerochaete chrysosporium</i> |                             |                            | 64.1                                               | 64.9                                                 |
